# Supplementary material for: Large Faraday effect and structural properties of heavily Tb3+-doped borogermanate glasses: a potential precursor of magneto-optical fibers
Source: Research Square preprint supplement (doi:10.21203/rs.3.rs-235342/v1), 2021-02-24
Supplement: Supplementary file 1 [file 035e56ae7f956f7368ebe31e.docx]

| Peaks | Frequencies (cm-1) | Vibrational modes | References |
| --- | --- | --- | --- |
| 1 and 2 | 220 and 305 | Bending modes of Ge-O in the glassy network | 31-33 |
| 3 | 340-410 | Vibration of Ge-O- (NBO) corresponding to the Q1 species | 31, 33, 34, 37 |
| 4 | 470 | Symmetrical stretching vibrations of Ge-O-Ge bonds in 3-membered GeO4 rings | 35, 37 |
| 5 | 520 | Vibrations of Ge-O-Ge bonds in three-membered GeO4 | 35-37 |
| 6 | 574-598 | Symmetrical vibrations of Ge-O-Ge | 35-37 |
| 7 | 747 | Symmetrical stretching vibrations of metaborate chains | 32, 34, 37 |
| 8 | 740-777 | Vibrations of borate rings (di-triborate rings) | 32, 34, 37 |
| 9 | 810-820 | Symmetrical stretching vibrations of Ge-O- (NBO) in Q2 species | 36, 38 |
| 10 | 790-830 | Symmetrical stretching vibrations of Ge-O- (NBO) in Q3 species | 36, 38 |
| 11 | 907-930 | Vibrational mode of diborate groups | 36 |
| 12 | 1200 | Diborates | 36 |
| 13 | 1337 | BO3/2 | 36 |
| 14 | 1427 | BO3/2ring | 36 |
| 15 | 1495 | B-O- | 36 |

Table 2. Assignments of the main vibrational modes for the BGB-*x*Tb glasses.
