# Supplementary material for: Large Faraday effect and structural properties of heavily Tb3+-doped borogermanate glasses: a potential precursor of magneto-optical fibers
Source: Research Square preprint supplement (doi:10.21203/rs.3.rs-235342/v1), 2021-02-24
Supplement: Supplementary file 3 [file 36adc46d44a2e402b95a17d4.docx]

| Sample label | Tg | Tx | ΔT | ρ (±0.002 g cm-3) | NTb3+ (1023 ions cm-3) |
| --- | --- | --- | --- | --- | --- |
| BGB-0Tb | 545 | 740 | 195 | 3.449 | 0 |
| BGB-4Tb | 570 | 766 | 196 | 4.504 | 20.0 |
| BGB-6Tb | 585 | 842 | 257 | 4.766 | 26.2 |
| BGB-8Tb | 605 | 910 | 305 | 5.035 | 31.1 |
| BGB-14Tb | 684 | 814 | 130 | 5.722 | 39.2 |
| BGB-16Tb | 720 | 820 | 100 | 5.984 | 41.2 |
| BGB-18Tb | 703 | 837 | 118 | 6.119 | 42.0 |

**Table 1.** Glass transition temperature (Tg), crystallization onset temperature (Tx), maximum crystallization temperature (Tp), thermal stability parameter (ΔT), density (ρ), and Tb3+ ion density values for the BGB-*x*Tb glasses.
